# Supplementary material for: Bariatric Surgery Induced Changes in Blood Cholesterol Are Modulated by Vitamin D Status
Source: MDPI journal article supplement (doi:10.3390/nu14102000), 2022-05-10
Supplement: s1 [file s1]

Supplement Table S1. Intervention results for biochemistry parameters adjusted to baseline values of BMI and body weight.

| Covariant    | BMI  |                   | Body weight |                   |
|--------------|------|-------------------|-------------|-------------------|
|              | p    | $\eta^2p\eta p^2$ | p           | $\eta^2p\eta p^2$ |
| hsCRP [mg/L] | 0.01 | 0.18              | 0.01        | 0.23              |
| LDL [mg/dL]  | 0.81 | 0.01              | 0.80        | 0.01              |
| HDLC[mg/dL]  | 0.10 | 0.07              | 0.04        | 0.10              |
| CHOL[mg/dL]  | 0.10 | 0.07              | 0.07        | 0.08              |
| TG [mg/dL]   | 0.10 | 0.07              | 0.06        | 0.09              |
| GLU [mg/dL]  | 0.00 | 0.26              | 0.00        | 0.27              |
| ALB [g/L]    | 0.01 | 0.17              | 0.00        | 0.25              |
| PRO [g/L]    | 0.09 | 0.08              | 0.02        | 0.13              |

**Note:** hsCRP, C-reactive protein highly sensitive; LDLC, low-density lipoprotein cholesterol; HDLC, high-density lipoprotein cholesterol; CHOL, cholesterol; TG, triglycerides; GLU, glucose; ALB, albumin; PRO, protein; ANCOVA, analysis of covariance.

Supplement Table S2. Correlation between baseline vitamin D and metabolic parameters.

| Baseline             | Weight (B) | Weight (C) | BMI (B) | BMI (C) |
|----------------------|------------|------------|---------|---------|
| 25(OH)D3 [ng/mL]     | -0.07      | -0.12      | -0.05   | 0.11    |
| 25(OH)D2 [ng/mL]     | -0.10      | -0.17      | -0.12   | -0.23   |
| 24,25(OH)2D3 [ng/mL] | -0.04      | -0.10      | -0.08   | 0.18    |
| epi-25(OH)D3 [ng/mL] | -0.18      | -0.13      | -0.10   | 0.06    |
